# Supplementary material for: Hierarchical modularity of nested bow-ties in metabolic networks
Source: Springer Nature journal article supplement (doi:10.1186/1471-2105-7-386), 2006-08-18

2ALAC  
 ALAC-S  
 LAC-R  
 LAC-S  
 ACDDL  
 HTHDP  
 PEP  
 2PGLY  
 4H2OG  
 4HOG  
 PYR  
 2D3D8PG  
 MTHGXL  
 LACD-S  
 LGT-S  
 23DHMB  
 3HMOBUT  
 ACCOA  
 AC  
 ACTP  
 AACoA  
 ACALD  
 ETHA  
 THR-L  
 SUCC  
 OASUC  
 ICIT  
 CACT  
 FUM  
 DCAMP  
 CIT  
 CITCoA  
 GLX  
 OAA  
 MAL-S  
 ASP-L  
 HOM-L  
 ASPSA  
 4PASP  
 PHOM  
 3HXCcoA-S  
 3HXCcoA  
 CROCoA  
 Ser-L  
 ACSER  
 PSER-L  
 3PPOPyr  
 CYS-L  
 CTHN  
 Gly  
 Cys-Gly  
 HCYS-L  
 SUCHMS  
 CYST-L  
 GLUT  
 GTSPMD  
 GLUCYS  
 SPMD  
 DHAP  
 GAP  
 2DR5P  
 FDP  
 F16BP-B  
 E4P  
 XU5P-D  
 13DPG  
 3PG  
 F1P  
 2D5KGA8P  
 S17BP  
 XU1P-L  
 FC1P  
 RML1P  
 Gly3P  
 Gly3PTM  
 GLYC  
 GLYALD  
 Glycerone  
 Ala-B  
 3OXP  
 GLYCT  
 2H3OPPAN  
 RU5P-D  
 S7P  
 R5P  
 G6P-D  
 G6P-B  
 MAN8P  
 MNL1P  
 G6P  
 F6P  
 F6P-D  
 FRU  
 GLC-BD  
 GLC-D  
 GLC-AD  
 SUCR  
 TRES  
 UDPG  
 TRE6P  
 6PGG  
 GLCLP  
 G1P  
 GCALD  
 DHNT  
 2A4H8HDT  
 DHPT  
 2A78D4H8P  
 ARG-L  
 AGM  
 PTRC  
 CITR-L  
 ARGSUC  
 CBP  
 ACGLU  
 ACGLU5P  
 ACOm  
 ACG5SA  
 CDPDG  
 PPT  
 1ACG3P  
 PPTGP  
 Glu5SA  
 Glu5P  
 Gln-L  
 Glu-L  
 AKG  
 Om-L  
 DACG  
 PPTG  
 4ABUT  
 4ABUTN  
 SUCCDHL  
 3C1HTthPP  
 SUCOA  
 SUCCSD  
 ADE  
 ADN  
 AMP  
 5MTHA  
 5A4ICA  
 5A4ID  
 PRPP  
 AMET  
 Met-L  
 AMETAM  
 HXAN  
 INS  
 XAN  
 GMP  
 XMP  
 IMP  
 5F4IC  
 25DPNTP  
 25DTAO  
 dGTP  
 2A4H8DHP  
 GDP  
 GTP  
 GDPTP  
 FDNTP  
 DGDP  
 GBDP

**1**  
**2**  
**3**  
**4**  
**5**  
**6**  
**7**  
**8**  
**9**  
**10**  
**11**  
**12**

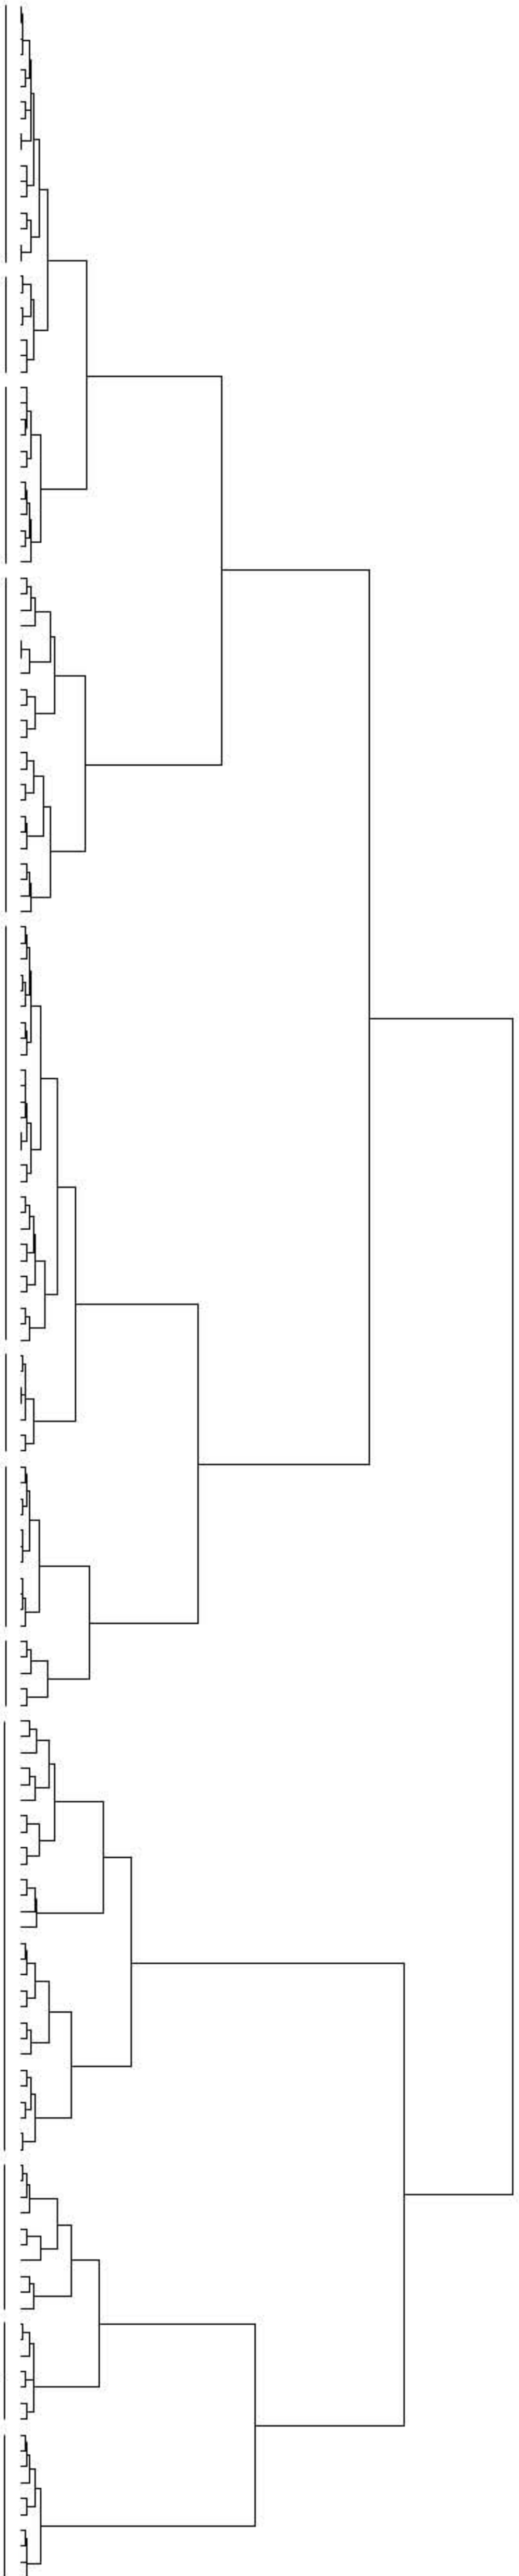

Supplement: 12859_2006_1125_MOESM4_ESM.pdf [file 12859_2006_1125_MOESM4_ESM.pdf]
