# Supplementary figures and images for: Hierarchical modularity of nested bow-ties in metabolic networks
Source: Springer Nature journal article supplement (doi:10.1186/1471-2105-7-386), 2006-08-18

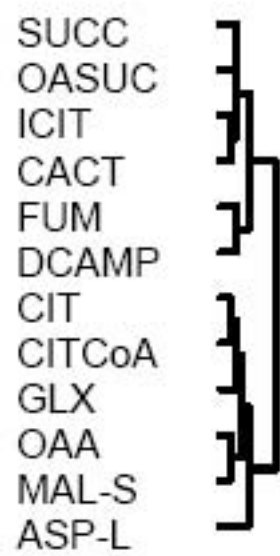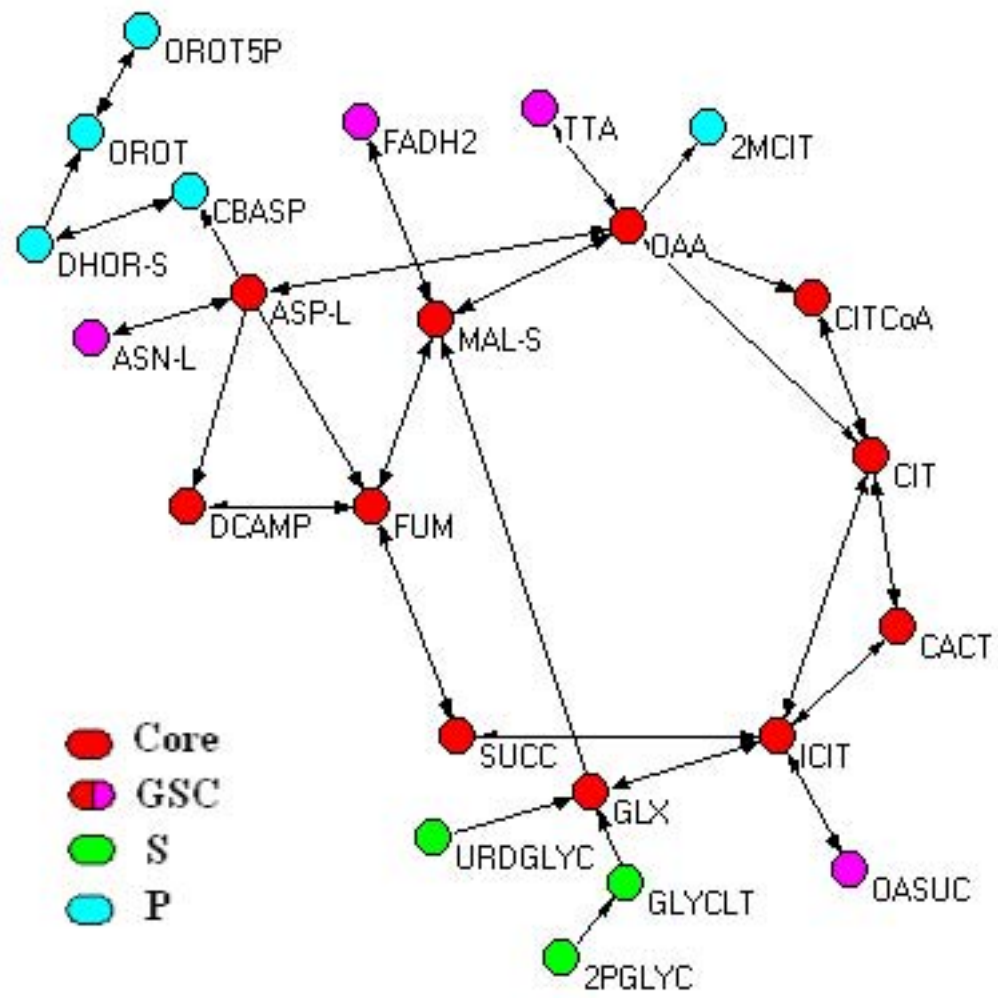

(A)

(B)

Supplement: 12859_2006_1125_MOESM10_ESM.pdf [file 12859_2006_1125_MOESM10_ESM.pdf]

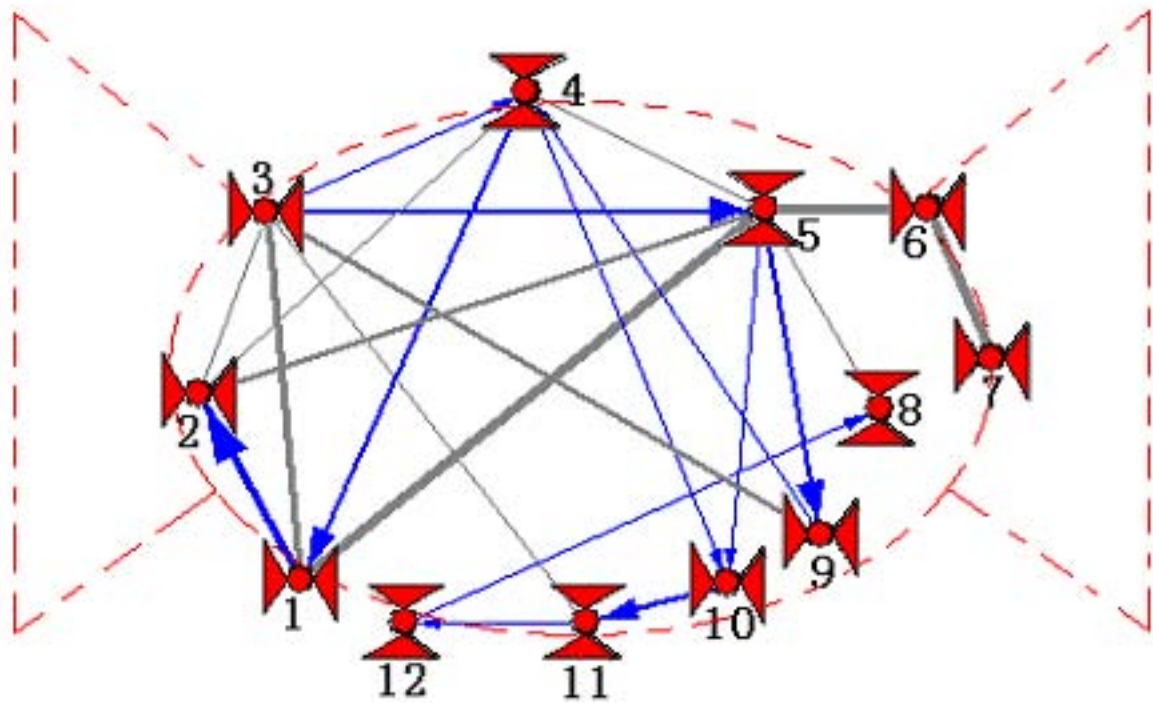

Supplement: 12859_2006_1125_MOESM11_ESM.pdf [file 12859_2006_1125_MOESM11_ESM.pdf]

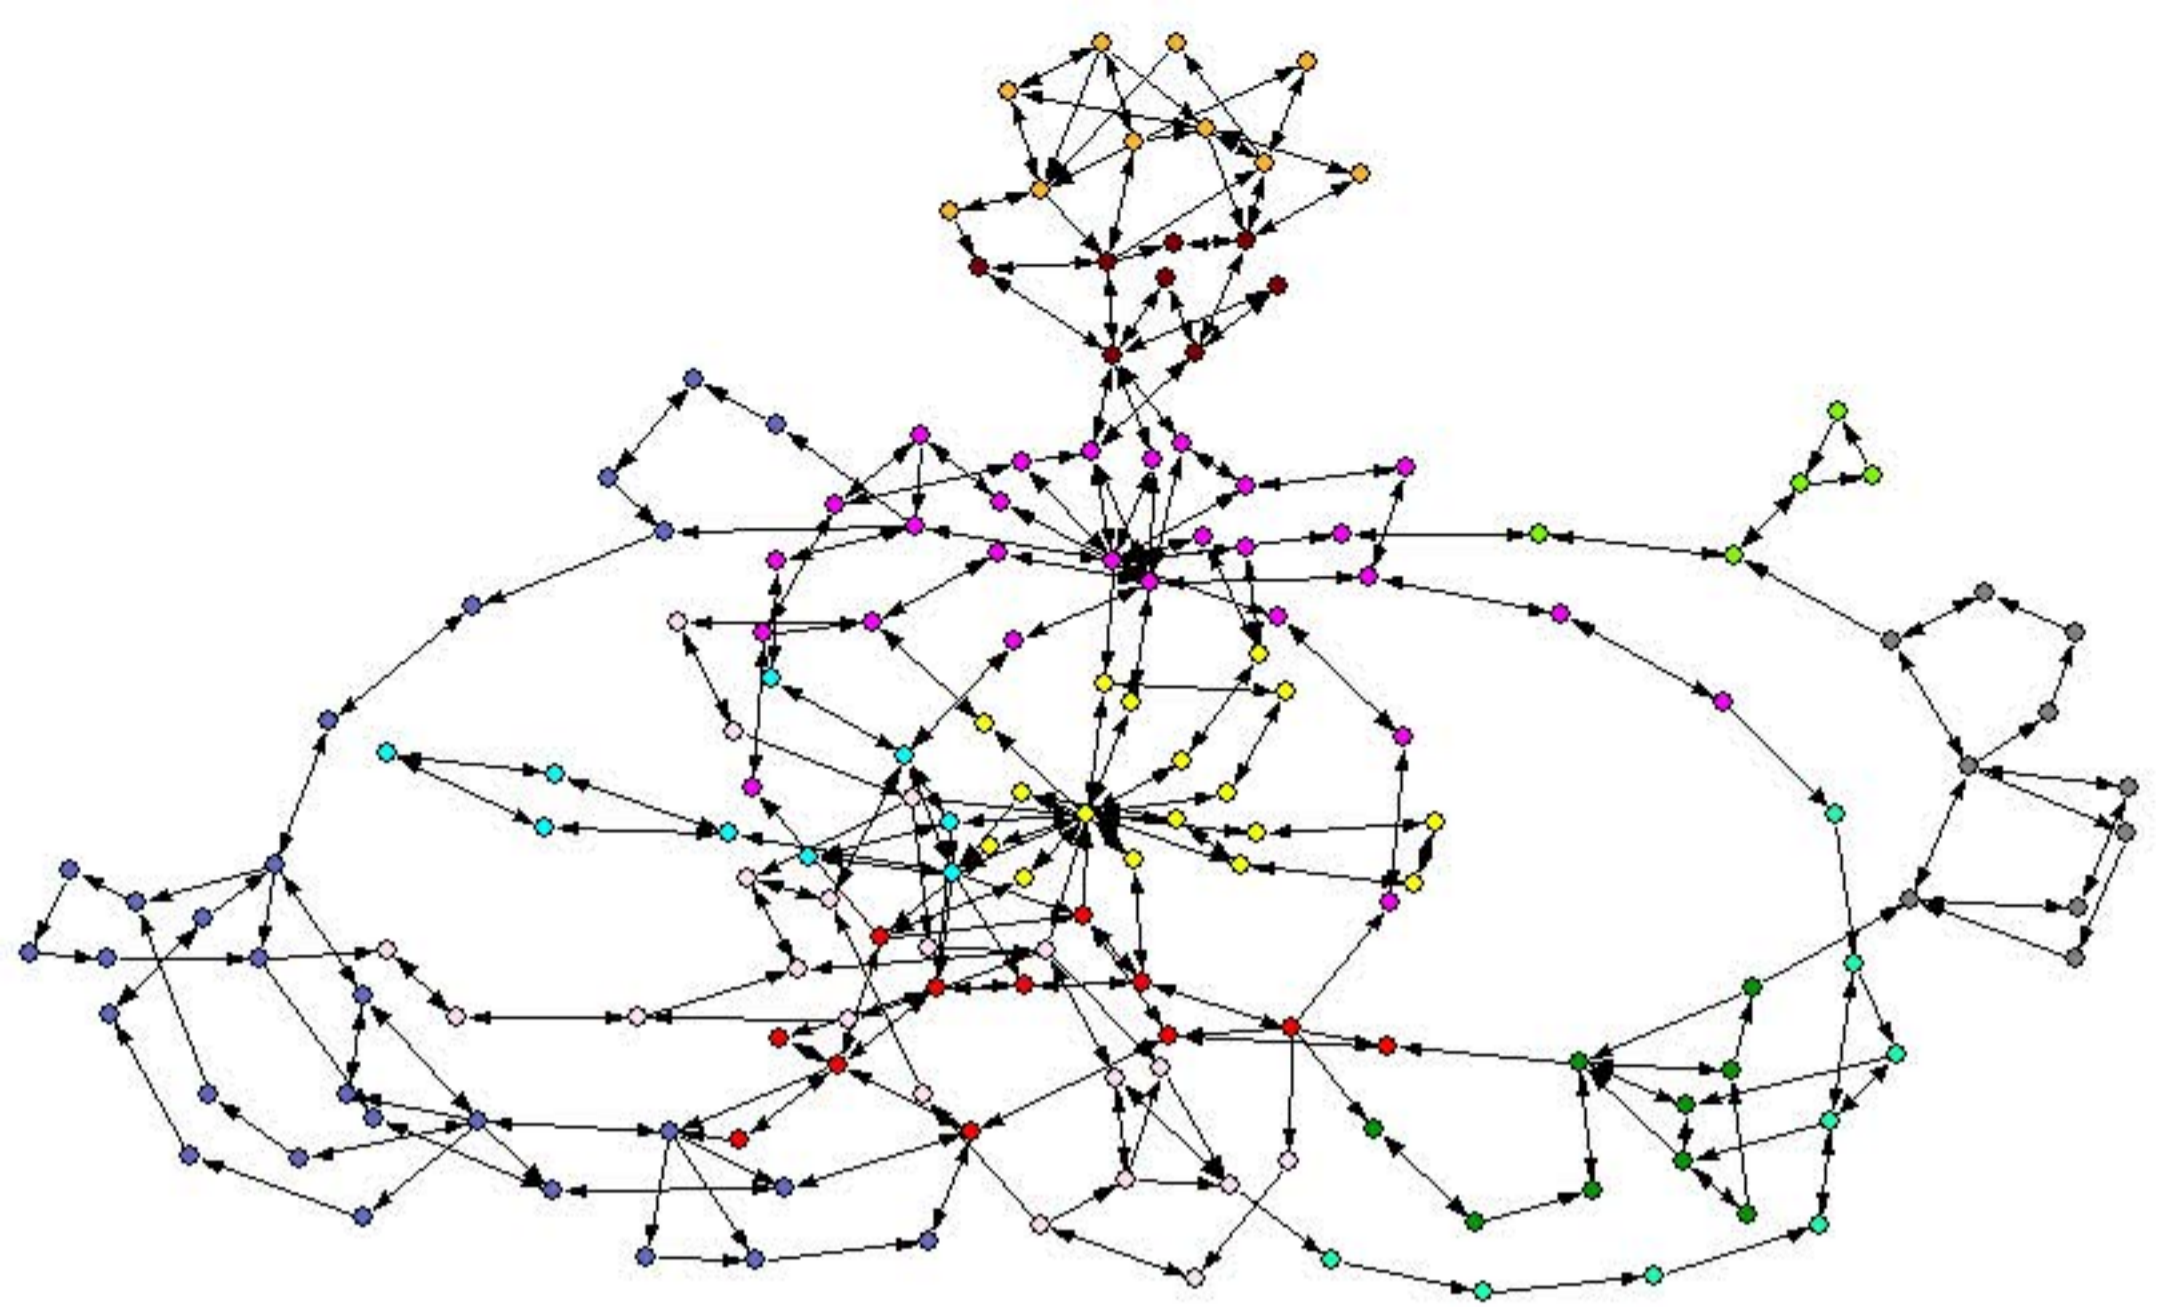

(A)

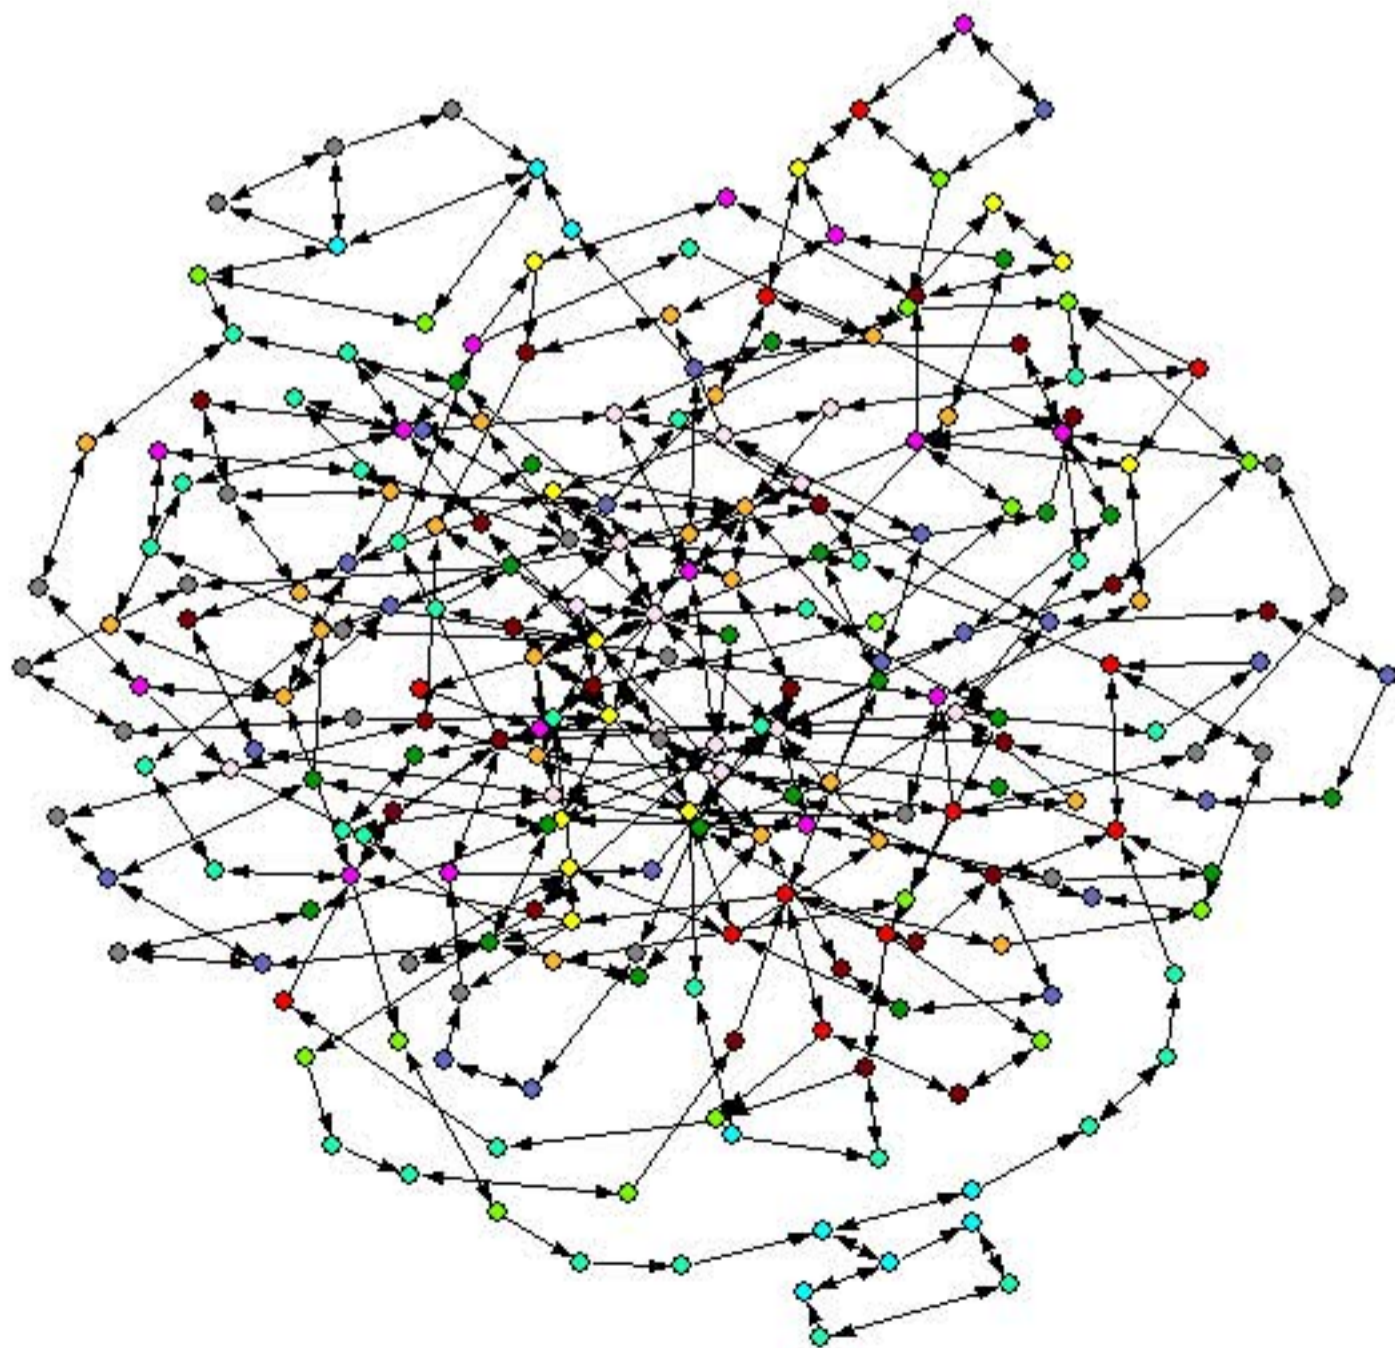

(B)

Supplement: 12859_2006_1125_MOESM12_ESM.pdf [file 12859_2006_1125_MOESM12_ESM.pdf]

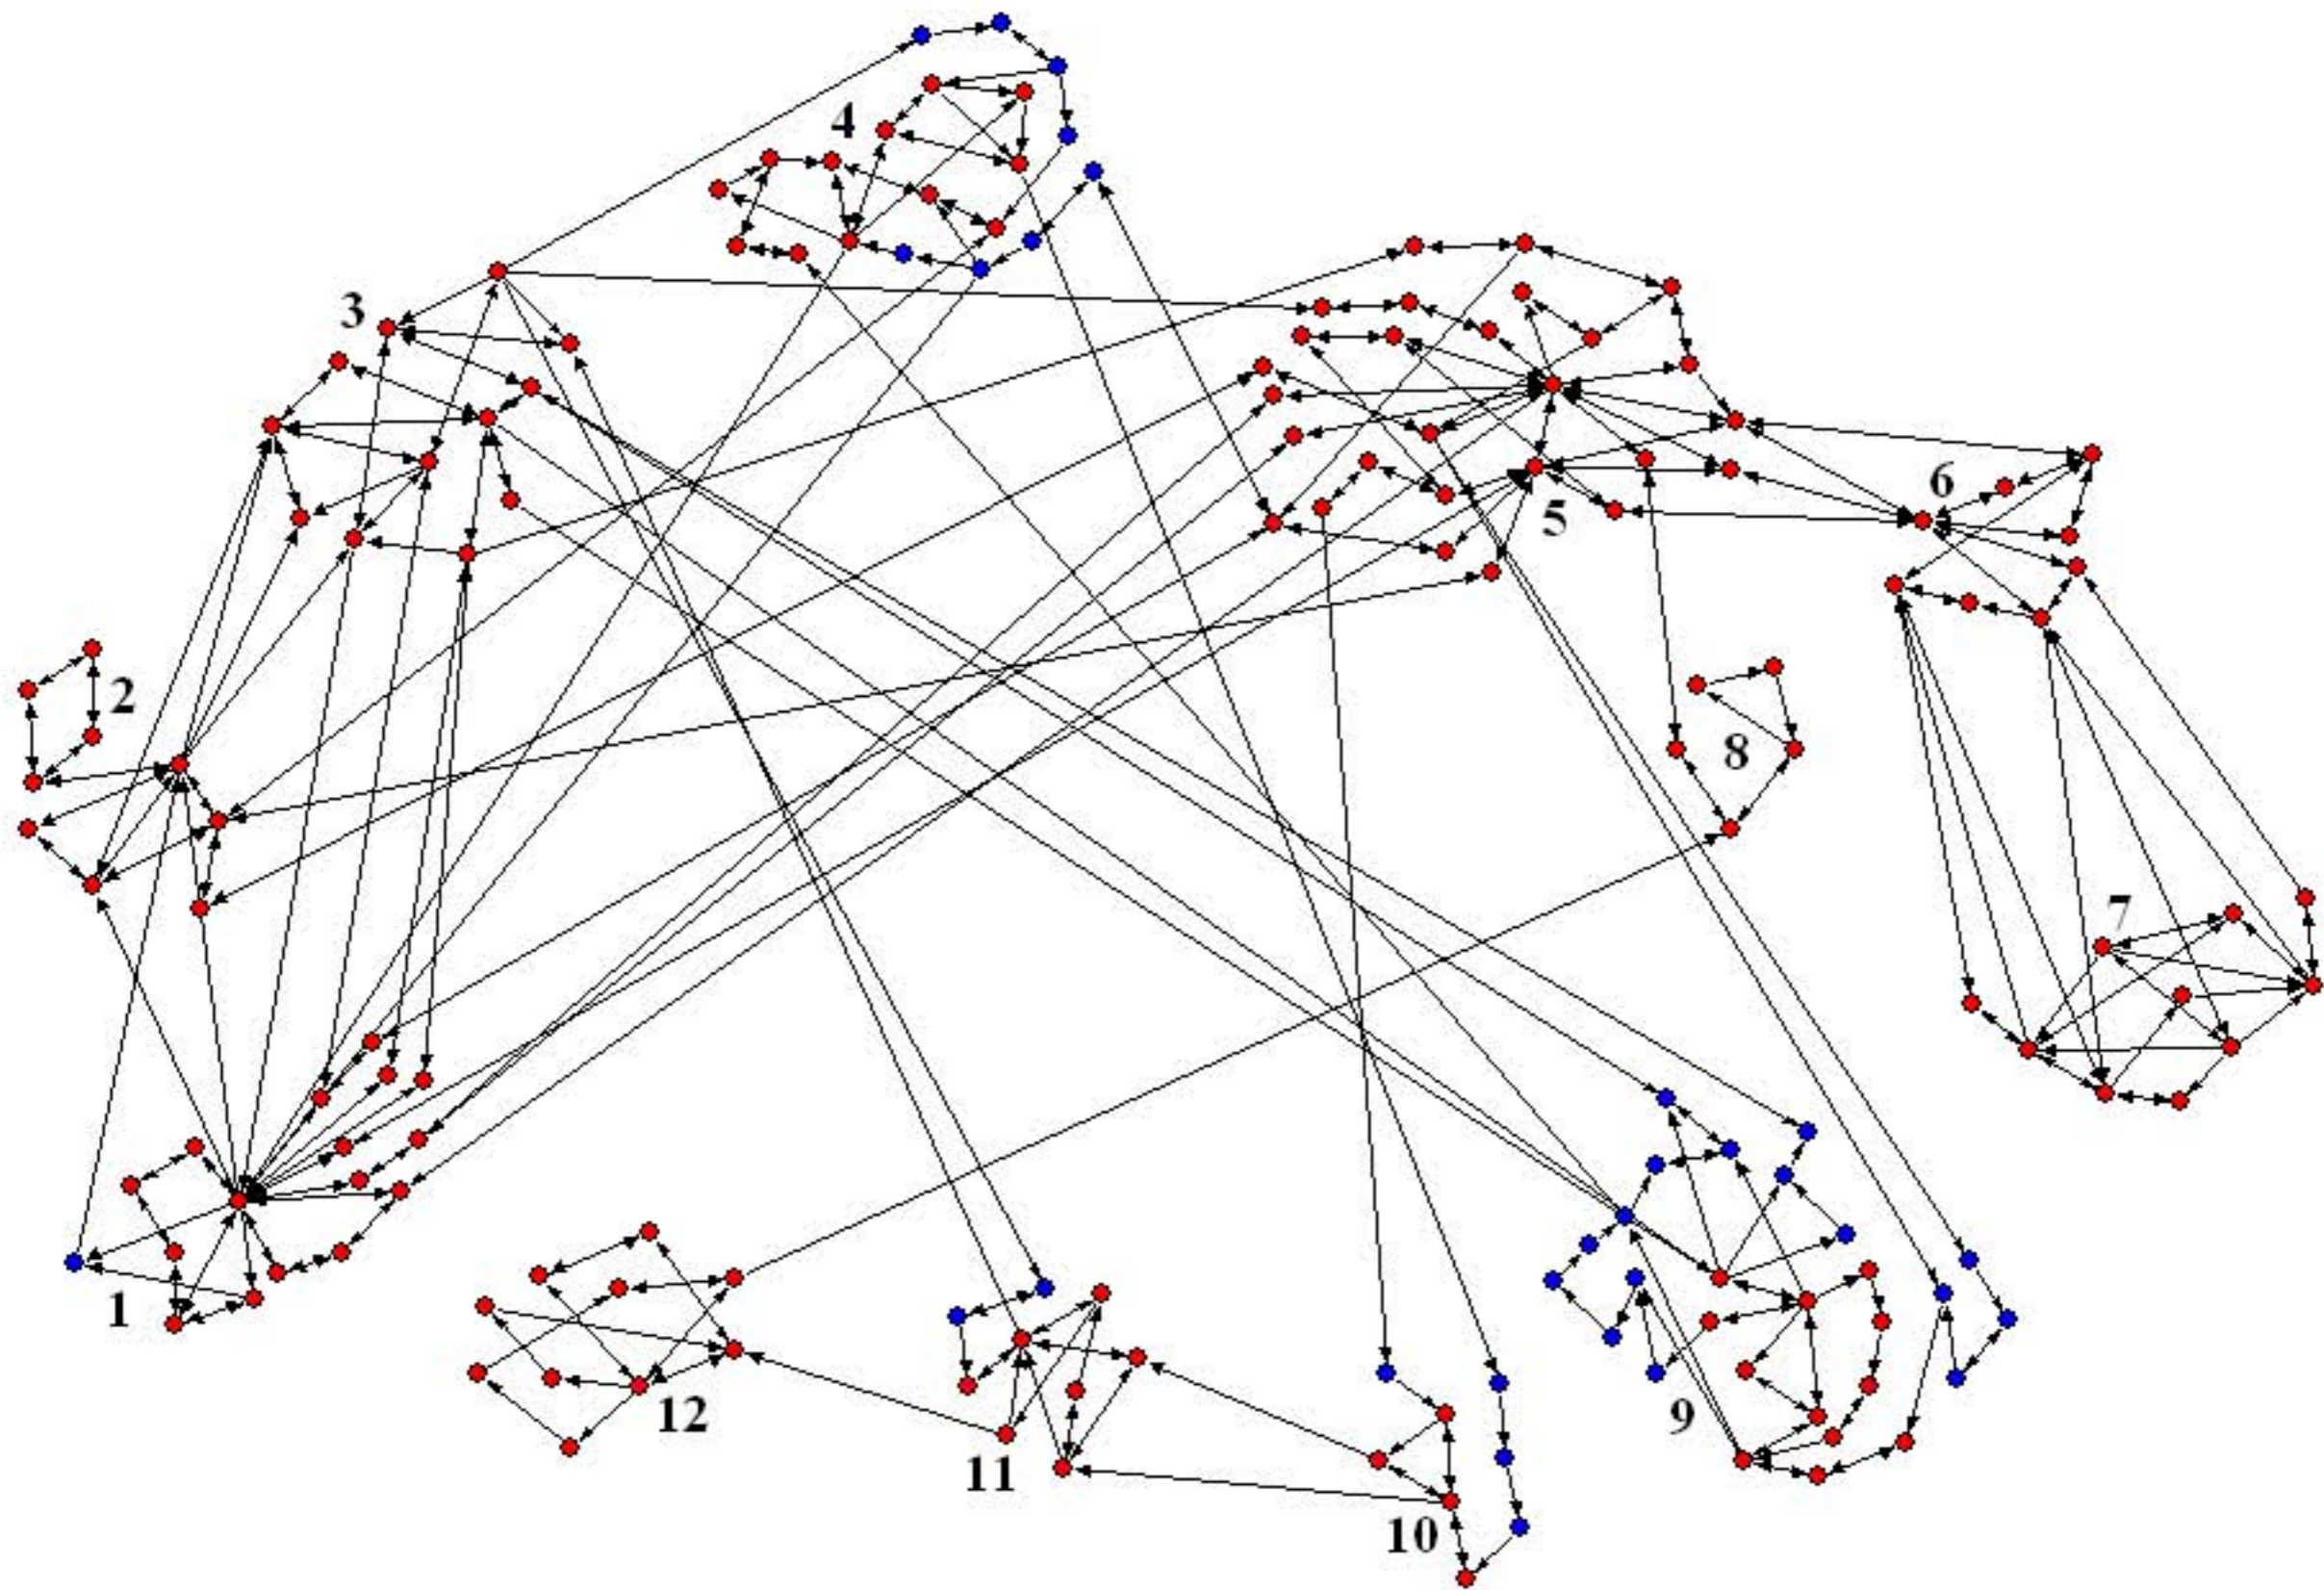

Supplement: 12859_2006_1125_MOESM5_ESM.pdf [file 12859_2006_1125_MOESM5_ESM.pdf]

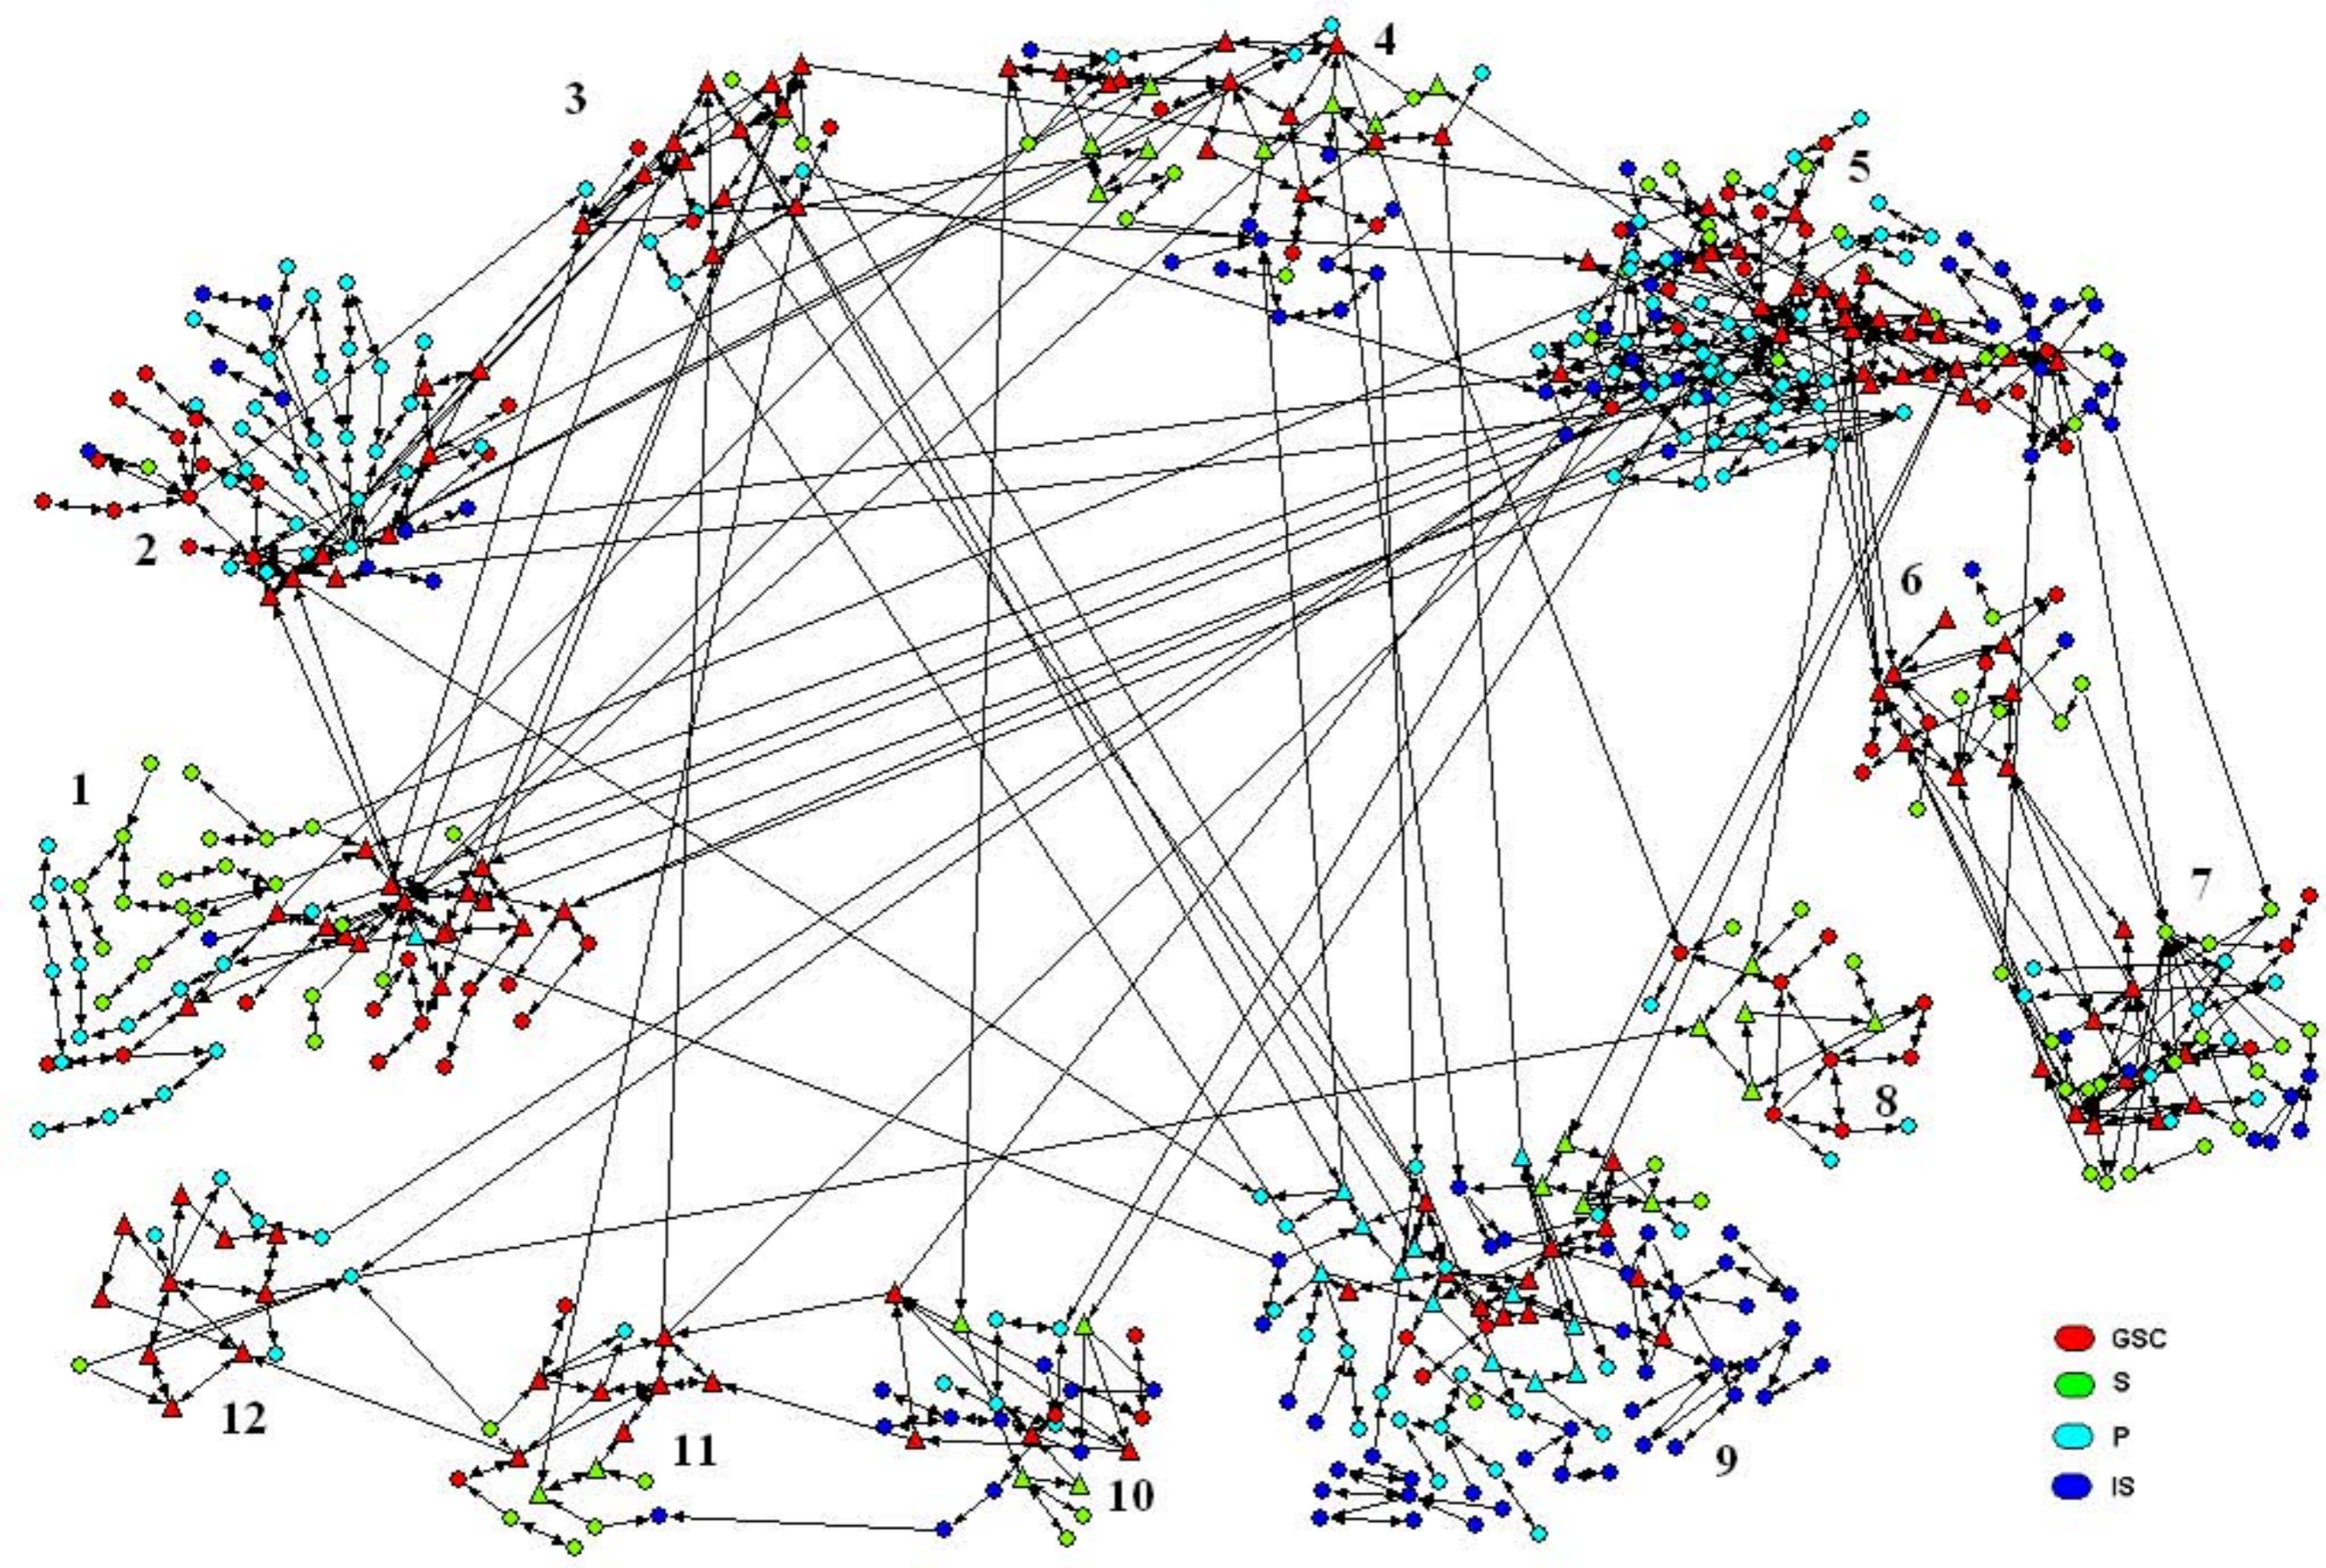

Supplement: 12859_2006_1125_MOESM6_ESM.pdf [file 12859_2006_1125_MOESM6_ESM.pdf]

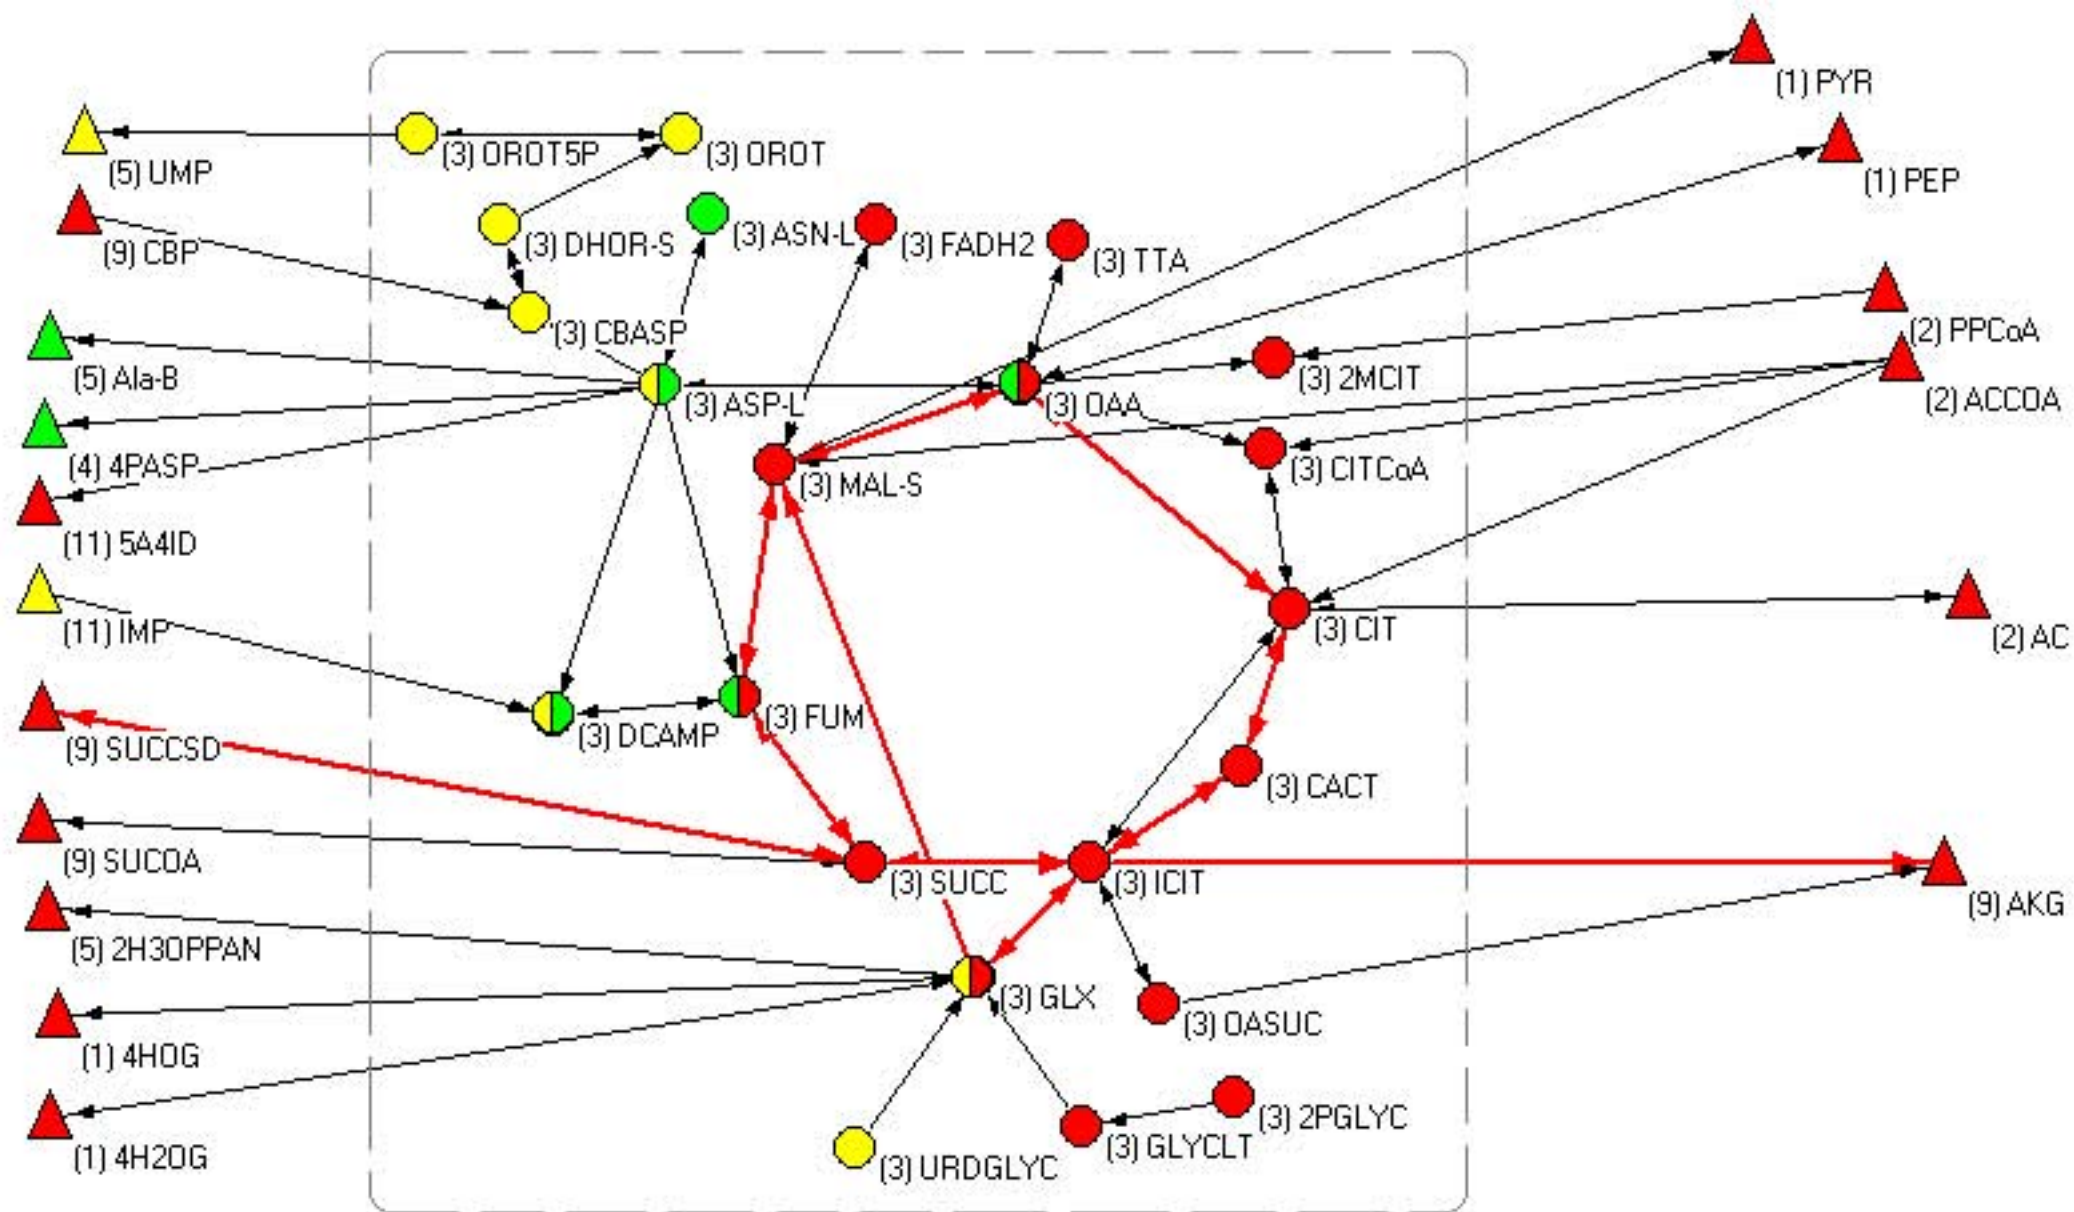

Supplement: 12859_2006_1125_MOESM8_ESM.pdf [file 12859_2006_1125_MOESM8_ESM.pdf]

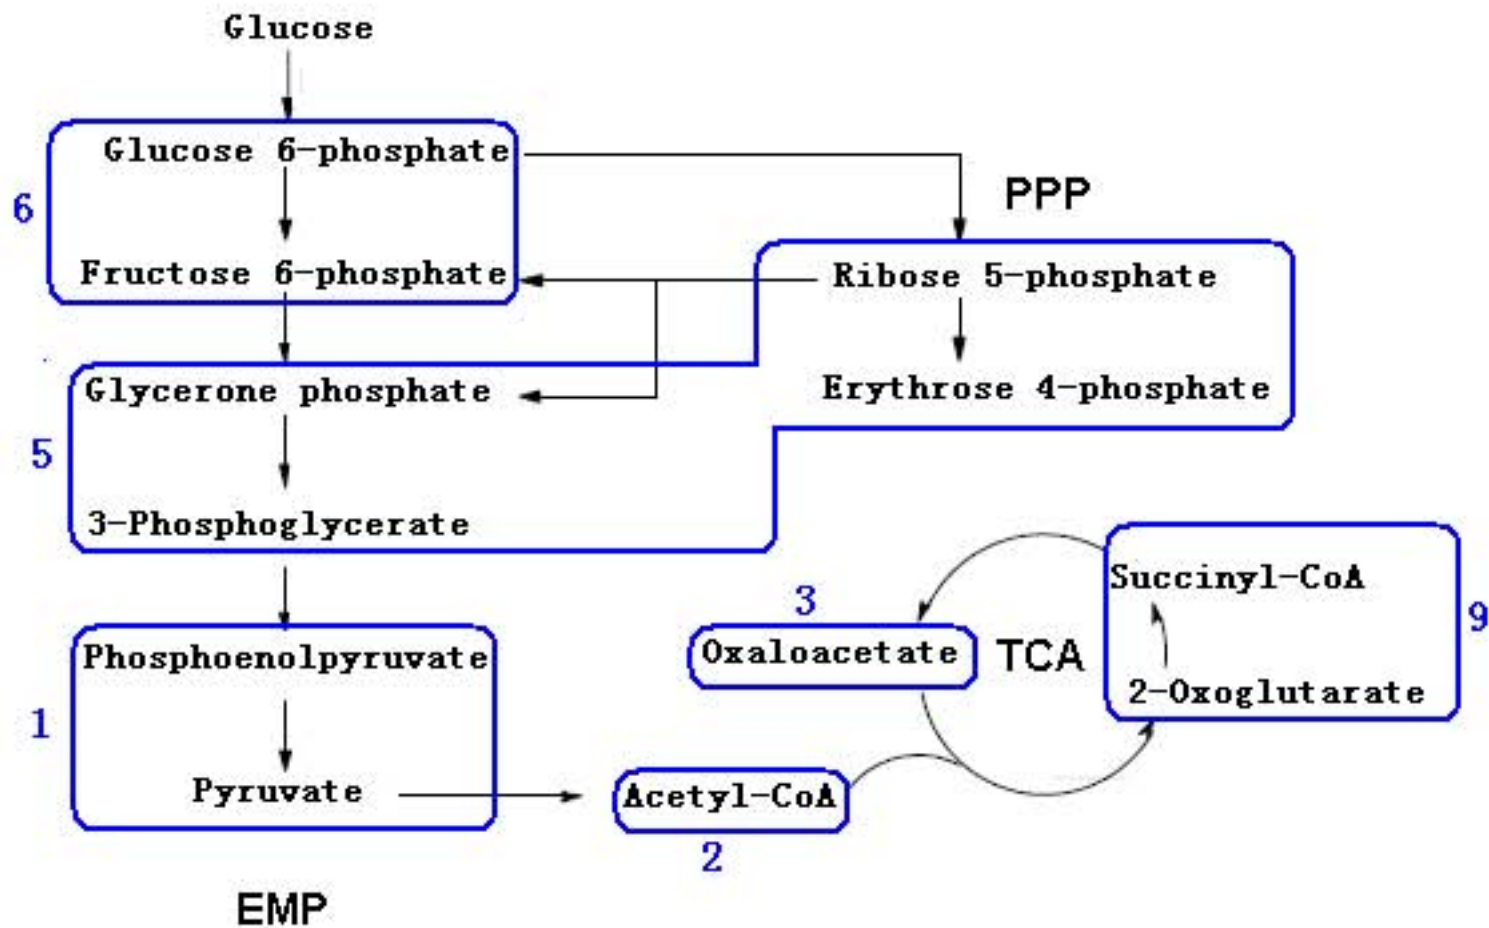

Supplement: 12859_2006_1125_MOESM9_ESM.pdf [file 12859_2006_1125_MOESM9_ESM.pdf]
